# Supplementary material for: Biomarker discovery studies for patient stratification using machine learning analysis of omics data: a scoping review
Source: HighWire-hosted journal article supplement (doi:10.1136/bmjopen-2021-053674), 2021-12-01
Supplement: bmjopen-2021-053674supp003_data_supplement.pdf [file bmjopen-2021-053674supp003_data_supplement.pdf]

**Online Supplementary file 3 – Data extraction form**

Data items extracted from each processed article during the full-text scoping review, and associated qualifications for each item.

| <b>Item</b>                                       | <b>Qualifications</b>                                                                                                                                                                                                                                                                                 |
|---------------------------------------------------|-------------------------------------------------------------------------------------------------------------------------------------------------------------------------------------------------------------------------------------------------------------------------------------------------------|
| <b>Authors</b>                                    |                                                                                                                                                                                                                                                                                                       |
| <b>Title</b>                                      |                                                                                                                                                                                                                                                                                                       |
| <b>Journal</b>                                    |                                                                                                                                                                                                                                                                                                       |
| <b>Volume</b>                                     |                                                                                                                                                                                                                                                                                                       |
| <b>Issue</b>                                      | (if applicable)                                                                                                                                                                                                                                                                                       |
| <b>Pages</b>                                      | (if applicable)                                                                                                                                                                                                                                                                                       |
| <b>Year</b>                                       |                                                                                                                                                                                                                                                                                                       |
| <b>Location</b>                                   |                                                                                                                                                                                                                                                                                                       |
| <b>URL / DOI</b>                                  |                                                                                                                                                                                                                                                                                                       |
| <b>Type of publication</b>                        | <ul style="list-style-type: none"> <li>• Research article</li> <li>• Meeting abstract</li> <li>• Review</li> </ul>                                                                                                                                                                                    |
| <b>Study population and sample size</b>           | (if applicable)                                                                                                                                                                                                                                                                                       |
| <b>Methodology / Study Design</b>                 | <ul style="list-style-type: none"> <li>• Case-control study</li> <li>• Cases only stratification study</li> </ul> <p>(+ further qualification, e.g. treatment response prediction, tumor subtype categorization, recurrence/relapse prediction, survival prediction, tissue-of-origin prediction)</p> |
| <b>Outcome assessment</b>                         | <ul style="list-style-type: none"> <li>• Performance measures (e.g. accuracy, sensitivity, specificity, Kohen's Kappa, F-score, AUC)</li> <li>• Validation scheme (cross-validation approach, external validation approach, single cohort or multiple cohorts)</li> </ul>                             |
| <b>Generic machine learning category</b>          | <ul style="list-style-type: none"> <li>• Supervised learning</li> <li>• Unsupervised learning</li> <li>• Other / mixed approaches</li> </ul>                                                                                                                                                          |
| <b>Name of specific machine learning approach</b> | (if applicable)                                                                                                                                                                                                                                                                                       |

| <b>Main results / key findings that relate to the research question</b> | short description |
|-------------------------------------------------------------------------|-------------------|
|-------------------------------------------------------------------------|-------------------|
